# Supplementary material for: A Versatile Method for Cell-Specific Profiling of Translated mRNAs in Drosophila
Source: PLoS One. 2012 Jul 6;7(7):e40276. doi: 10.1371/journal.pone.0040276 (PMC3391276; doi:10.1371/journal.pone.0040276)
Supplement: Table S5 — Genes with transcripts enriched in the cuticle are generally depleted from Elav-GAL4>UAS-GFP::RpL10A polysome preparations. All the genes highlighted in blue have transcripts that are significantly depleted in neurons compared to heads. Genes not highlighted have transcripts that are unchanged and genes highlighted in red have transcripts that are significantly enriched in neurons compared to heads. Overall, 57% of the genes with predicted expression in glia [18], fat body [19] and cuticle [20] have transcripts that are significantly depleted in neurons, 16% are enriched and 27% are not significantly changed. (DOC) [file pone.0040276.s009.doc]

Table S5. Genes with transcripts enriched in the cuticle are generally depleted from *Elav-GAL4>UAS-GFP::RpL10A* polysome preparations.

| **FlyBase ID** | **Gene Name** | **Chrom** | **Whole Head Mean (Fkpm)** | **SEM** | **RpL10A IP Mean (Fkpm)** | **SEM** | **Fold Depletion** |
| --- | --- | --- | --- | --- | --- | --- | --- |
| FBgn0036879 | *Cpr76Bb* | 3L | 4.02 | 0.24 | 0.00 | 0.00 | Inf |
| FBgn0014454 | *Acp1* | 2L | 2096.39 | 463.39 | 0.00 | 0.00 | Inf |
| FBgn0035985 | *Cpr67B* | 3L | 111.80 | 8.82 | 13.87 | 1.51 | 8.06 |
| FBgn0020642 | *Lcp65Ac* | 3L | 8.36 | 0.68 | 1.32 | 0.33 | 6.34 |
| FBgn0002440 | *l(3)mbn* | 3L | 13.87 | 1.84 | 2.64 | 0.32 | 5.26 |
| FBgn0033603 | *Cpr47Ef* | 2R | 29.76 | 3.41 | 6.27 | 0.33 | 4.74 |
| FBgn0036880 | *Cpr76Bc* | 3L | 20.95 | 2.23 | 5.62 | 0.69 | 3.73 |
| FBgn0020637 | *Lcp65Ag2* | 3L | 3.52 | 0.51 | 0.99 | 0.01 | 3.56 |
| FBgn0038819 | *Cpr92F* | 3R | 66.88 | 5.29 | 23.80 | 4.14 | 2.81 |
| FBgn0033730 | *Cpr49Ag* | 2R | 104.40 | 7.17 | 37.31 | 3.64 | 2.80 |
| FBgn0039480 | *Cpr97Ea* | 3R | 102.54 | 6.59 | 41.25 | 2.96 | 2.49 |
| FBgn0039805 | *Cpr100A* | 3R | 673.64 | 23.80 | 275.84 | 22.49 | 2.44 |
| FBgn0033597 | *Cpr47Ea* | 2R | 11.06 | 1.26 | 5.29 | 0.90 | 2.09 |
| FBgn0039481 | *Cpr97Eb* | 3R | 163.97 | 9.35 | 90.10 | 4.67 | 1.82 |
| FBgn0033602 | *Cpr47Ee* | 2R | 30.01 | 3.31 | 21.78 | 1.44 | 1.38 |
| FBgn0035281 | *Cpr62Bc* | 3L | 179.03 | 10.26 | 136.74 | 5.10 | 1.31 |
| FBgn0042119 | *Cpr65Au* | 3L | 96.17 | 16.31 | 88.85 | 4.17 | 1.08 |
| FBgn0005664 | *Cry* | 2L | 251.54 | 14.94 | 395.25 | 18.39 | 0.64 |
| FBgn0034517 | *Cpr57A* | 2R | 11.40 | 1.02 | 20.79 | 2.24 | 0.55 |
| FBgn0035510 | *Cpr64Aa* | 3L | 9.88 | 0.86 | 26.07 | 2.05 | 0.38 |
| FBgn0033728 | *Cpr49Ae* | 2R | 117.10 | 3.54 | 350.04 | 8.49 | 0.33 |
| FBgn0035512 | *Cpr64Ac* | 3L | 4.52 | 0.68 | 24.45 | 2.71 | 0.19 |
| FBgn0034157 | *resilin* | 2R | 5.69 | 0.43 | 77.66 | 16.72 | 0.07 |

All the genes highlighted in blue have transcripts that are significantly depleted in neurons compared to heads. Genes not highlighted have transcripts that are unchanged and genes highlighted in red have transcripts that are significantly enriched in neurons compared to heads. Overall, 57% of the genes with predicted expression in glia[18], fat body [19] and cuticle [20] have transcripts that are significantly depleted in neurons, 16% are enriched and 27% are not significantly changed.
